# Supplementary material for: Current Status of the Self-Expandable Metal Stent as a Bridge to Surgery Versus Emergency Surgery in Colorectal Cancer: Results from an Updated Systematic Review and Meta-Analysis of the Literature
Source: PubMed Central journal article supplement (PMC7998540; doi:10.3390/medicina57030268), 2021-03-15
Supplement: medicina-57-00268-s001.pdf [file medicina-57-00268-s001.pdf]

Supplement 1.

| Author                 | Mean age            |                     | Sex M: F   |               | Stage IV   |               |
|------------------------|---------------------|---------------------|------------|---------------|------------|---------------|
|                        | SEMS group          | Surgery group       | SEMS group | Surgery group | SEMS group | Surgery group |
| Cheung et al., 2009    | 59                  | 62.5                | 14:10      | 12:12         | 2          | 11            |
| Alcántara et al., 2011 | 71.9                | 71.15               | 5:10       | 7:6           | 2          | 2             |
| Cui et al., 2011       | N.A.                | N.A.                | N.A.       | N.A.          | N.A.       | N.A.          |
| Van Hooft et al., 2011 | 70.4                | 71.4                | 24:23      | 27:24         | N.A.       | N.A.          |
| Pirlet et al., 2011    | 70.4                | 74.7                | 16:14      | 13:17         | 0          | 0             |
| Ho et al., 2012        | 68                  | 65.75               | 13:7       | 9:10          | 3          | 7             |
| Ghazal et al., 2013    | 52.25               | 51                  | 12:18      | 19:11         | 0          | 0             |
| Arezzo et al., 2017    | 66.5                | 64                  | 28:28      | 32:27         | 0          | 0             |
| Elwan et al., 2020     | 59.6                | 60.3                | 18:12      | 20:10         | N.A.       | N.A.          |
| Arezzo et al., 2020    | 72<br>(range 43-98) | 71<br>(range 44-94) | 28:28      | 32:27         | 3          | 4             |

Supplement 2.

| Author                 | Colorectal cancer location |                  |                 |                  |               |              |        |              |
|------------------------|----------------------------|------------------|-----------------|------------------|---------------|--------------|--------|--------------|
|                        | Right colon                | Transverse colon | Splenic flexure | Descending colon | Sigmoid colon | Rectosigmoid | Rectum | Not reported |
| Cheung et al., 2009    | 0                          | 0                | 0               | 0                | 0             | 0            | 0      | 48           |
| Alcántara et al., 2011 | 0                          | 0                | 6               | 3                | 15            | 3            | 1      | 0            |
| Cui et al., 2011       | 0                          | 0                | 0               | 49               | 0             | 0            | 0      | 0            |
| Van Hooft et al., 2011 | 0                          | 0                | 98              |                  |               |              | 0      | 0            |
| Pirlet et al., 2011    | 0                          | 0                | 3               | 8                | 33            | 15           | 0      | 1            |
| Ho et al., 2012        | 0                          | 0                | 4               | 9                | 18            | 8            | 0      | 0            |
| Ghazal et al., 2013    | 0                          | 0                | 0               | 7                | 31            | 22           | 0      | 0            |
| Arezzo et al., 2017    | 0                          | 0                | 18              | 77               | 20            | 0            | 0      | 0            |
| Elwan et al., 2020     | 9                          | 0                | 0               | 51               | 0             | 0            | 0      | 0            |
| Arezzo et al., 2020    | 0                          | 0                | 18              | 77               | 20            | 0            | 0      | 0            |

Supplement 3.

| Author                 | Type of surgical access for colonic resection |               | Emergency surgery  |                               |
|------------------------|-----------------------------------------------|---------------|--------------------|-------------------------------|
|                        | SEMS group                                    | Surgery group | Type surgery       | Intraoperative colonic lavage |
| Cheung et al., 2009    | Lap                                           | Open          | TACIR, HP, RPA     | Yes                           |
| Alcántara et al., 2011 | Open                                          | Open          | HP, RPA            | Yes                           |
| Cui et al., 2011       | Lap                                           | Open          | NR                 | NR                            |
| Van Hooff et al., 2011 | Open/Lap                                      | Open/Lap      | HP, RPA, DC        | NR                            |
| Pirlet et al., 2011    | Lap                                           | Open          | TACIR, HP, RPA, DC | NR                            |
| Ho et al., 2012        | Open/Lap                                      | Open          | TACIR, HP, RPA, DC | NR                            |
| Ghazal et al., 2013    | Open                                          | Open          | TACIR              | NR                            |
| Arezzo et al., 2017    | Open/Lap                                      | Open/Lap      | TACIR, HP, RPA,    | NR                            |
| Elwan et al., 2020     | NR                                            | NR            | TACIR, HP, RPA, DC | Yes                           |
| Arezzo et al., 2020    | Open/Lap                                      | Open          | HP, TACIR, RPA, DC | Yes                           |

Lap: Laparoscopy

TACIR: Total or Subtotal Abdominal Colectomy and Ileorectal Anastomosis

HP: Hartmann's Procedure

RPA: Resection and Primary Anastomosis

DC: Derivative Colostomy

Supplement 4.

| <b>Author</b>          | <b>Stent type</b>                           | <b>The time between stent placement and elective surgery (days)</b> | <b>Perforation rate</b> |
|------------------------|---------------------------------------------|---------------------------------------------------------------------|-------------------------|
| Cheung et al., 2009    | Wallstent                                   | median of 10 days (2-16 days)                                       | 0                       |
| Alcántara et al., 2011 | Wallflex                                    | 5-7 days                                                            | NR                      |
| Cui et al., 2011       | N.R.                                        | median of 3,10 days                                                 | NR                      |
| Van Hooff et al., 2011 | Wallstent or Wallflex                       | 5-14 days                                                           | 12%                     |
| Pirlet et al., 2011    | Bard Nitinol uncovered self-expanding stent | 7 days (5-19 days)                                                  | 14%                     |
| Ho et al., 2012        | Wallflex                                    | 10 days (9-38 days)                                                 | 0                       |
| Ghazal et al., 2013    | Wallflex                                    | 7-10 days                                                           | 0                       |
| Arezzo et al., 2017    | WallFlex/Hanaro                             | 10 days (3-8 days)                                                  | 8.92%                   |
| Elwan et al., 2020     | Wallflex                                    | NR                                                                  | 0                       |
| Arezzo et al., 2020    | WallFlex/Hanaro                             | 3-8 days                                                            | 8.9%                    |

Supplement 5a.

Risk of Bias graph: review authors' judgements regarding the risk of bias for each item presented as percentages for all included studies.

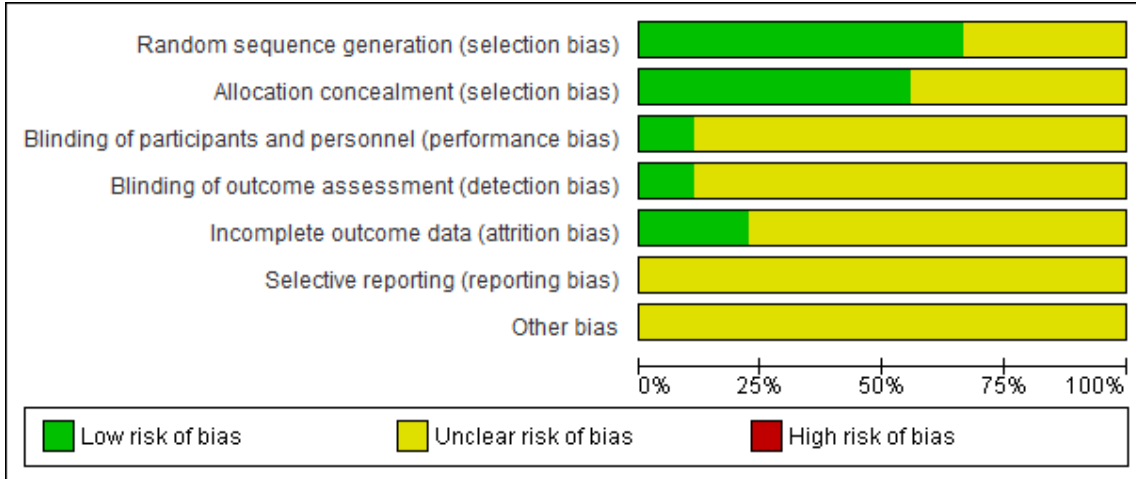

Supplement 5b.

Risk of Bias Summary: review authors' judgements regarding the risk of bias for each of the included studies.

|                | Random sequence generation (selection bias) | Allocation concealment (selection bias) | Blinding of participants and personnel (performance bias) | Blinding of outcome assessment (detection bias) | Incomplete outcome data (attrition bias) | Selective reporting (reporting bias) | Other bias |
|----------------|---------------------------------------------|-----------------------------------------|-----------------------------------------------------------|-------------------------------------------------|------------------------------------------|--------------------------------------|------------|
| Alcantara 2011 | ?                                           | ?                                       | ?                                                         | ?                                               | ?                                        | ?                                    | ?          |
| Arezzo 2016    | +                                           | +                                       | ?                                                         | ?                                               | ?                                        | ?                                    | ?          |
| Cheung 2009    | +                                           | ?                                       | ?                                                         | ?                                               | ?                                        | ?                                    | ?          |
| Cui 2011       | ?                                           | ?                                       | ?                                                         | ?                                               | ?                                        | ?                                    | ?          |
| Elwan 2020     | ?                                           | ?                                       | ?                                                         | ?                                               | +                                        | ?                                    | ?          |
| Ghazal 2013    | +                                           | +                                       | ?                                                         | ?                                               | ?                                        | ?                                    | ?          |
| Ho 2012        | +                                           | +                                       | ?                                                         | ?                                               | ?                                        | ?                                    | ?          |
| Pirlet 2011    | +                                           | +                                       | ?                                                         | ?                                               | ?                                        | ?                                    | ?          |
| van Hoof 2011  | +                                           | +                                       | +                                                         | +                                               | +                                        | ?                                    | ?          |
